# Supplementary material for: Selection of affinity peptides for the purification potential of porcine circovirus type 2 (PCV2) Cap virus-like particles (VLPs)
Source: Royal Society of Chemistry journal article supplement (doi:10.1039/c7ra05790c), 2017-01-01
Supplement: c7ra05790c1.pdf [file c7ra05790c1.pdf]

### Electronic Supplementary Information (ESI)

Table S1 Enrichment of phage that bind r-Cap after each round of biopanning

| Round | Coating<br>r-Cap<br>( $\mu\text{g mL}^{-1}$ ) | Binding time<br>(min) | Washing<br>(%PBST) | Input<br>(Pfu)       | Output<br>(Pfu)   |
|-------|-----------------------------------------------|-----------------------|--------------------|----------------------|-------------------|
| 1     | 40                                            | 60                    | 0.1                | $1.5 \times 10^{11}$ | $1.6 \times 10^6$ |
| 2     | 20                                            | 30                    | 0.5                | $1.5 \times 10^{11}$ | $2.1 \times 10^6$ |
| 3     | 20                                            | 15                    | 0.5                | $1.5 \times 10^{11}$ | $1.7 \times 10^6$ |
